# Supplementary material
Source: PubMed Central journal article supplement (PMC3273392)
Supplement: emboj2011429s2.pdf [file emboj2011429s2.pdf]

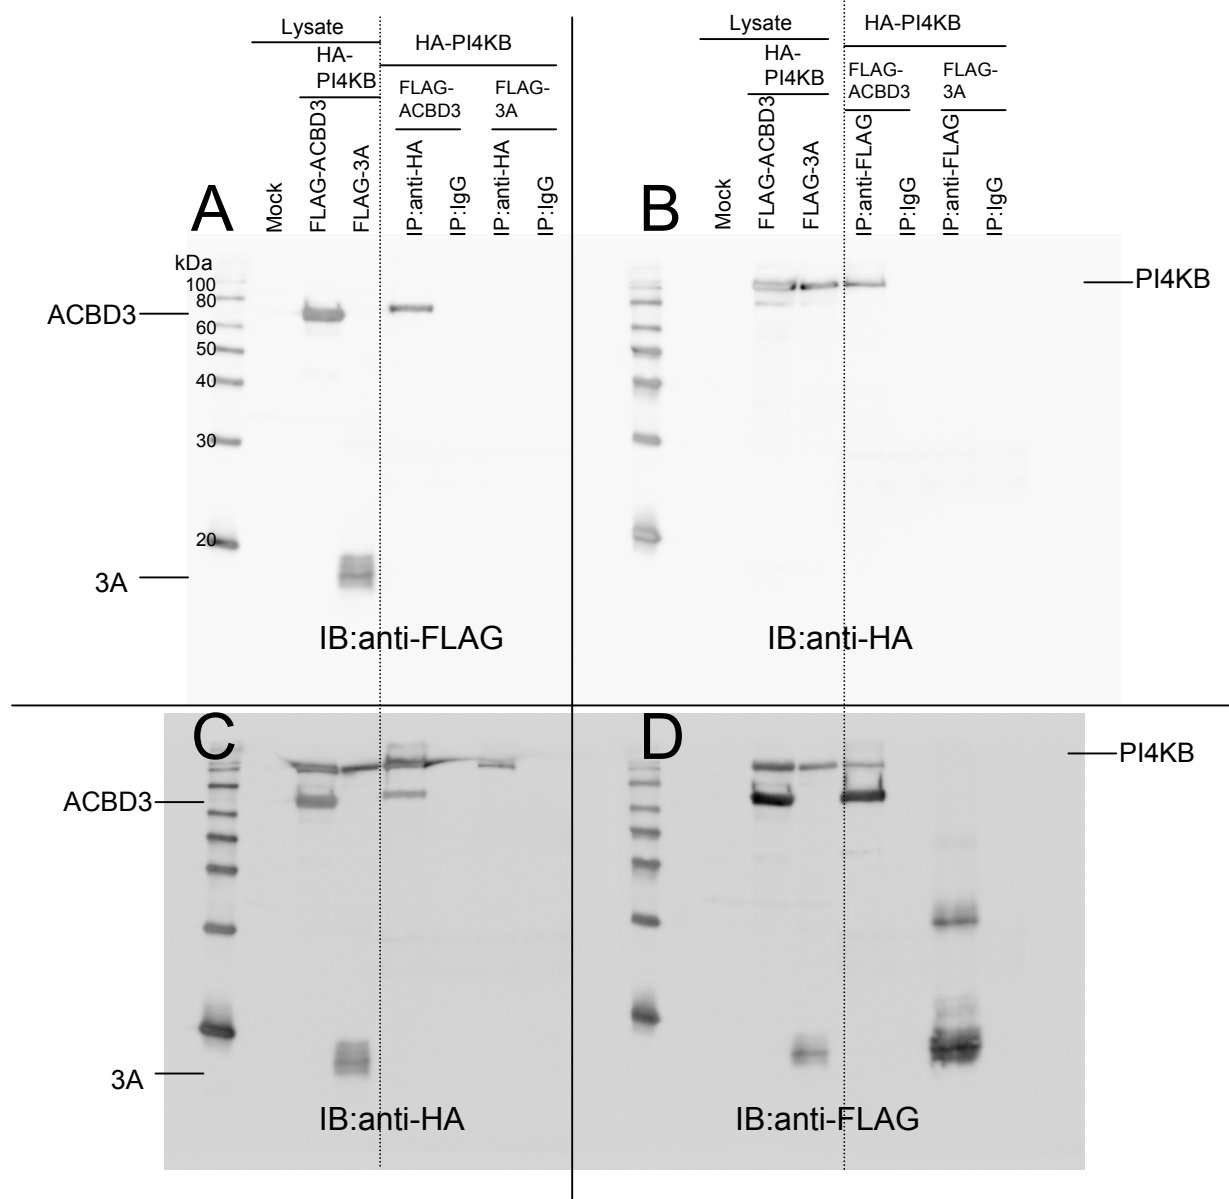

Figure S2. Original data for Figure 6B. After probed with the indicated antibodies, membranes A and B were probed with the indicated antibodies without antibody stripping (C and D, respectively).
