# Supplementary material
Source: PubMed Central journal article supplement (PMC3273392)

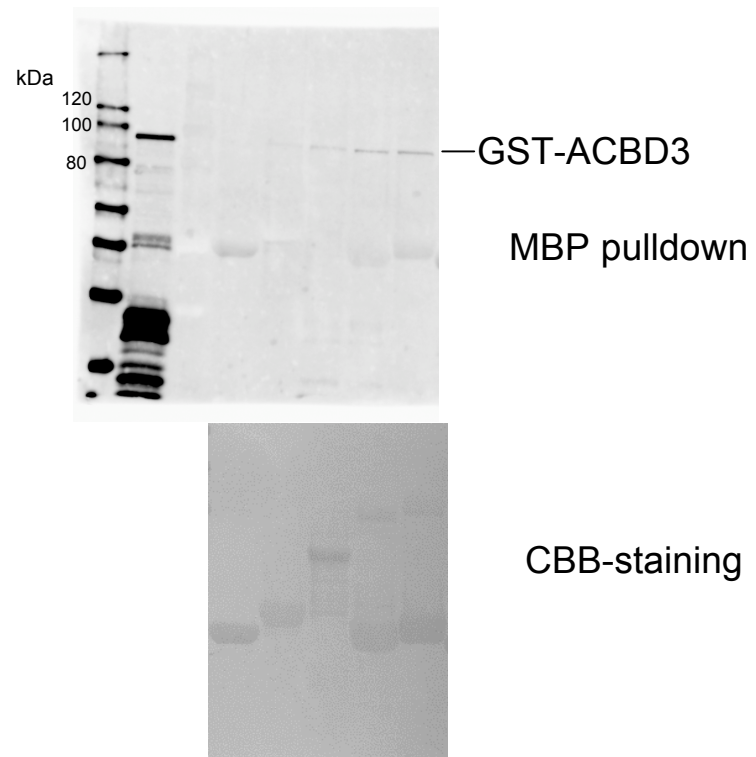

Figure S1. Original data for Figure 1C.

Supplement: emboj2011429s1.pdf [file emboj2011429s1.pdf]
